# Supplementary material for: Microbiota-based Signature of Gingivitis Treatments: A Randomized Study
Source: PubMed Central journal article supplement (PMC4837389; doi:10.1038/srep24705), 2016-04-20
Supplement: srep24705-s1.pdf [file srep24705-s1.pdf]

## Microbiota-based Signature of Gingivitis Treatments: A Randomized Study

Shi Huang<sup>a,f,g,1</sup>, Zhen Li<sup>b,1</sup>, Tao He<sup>c,1</sup>, Cunpei Bo<sup>a</sup>, Jinlan Chang<sup>d</sup>, Lin Li<sup>d</sup>, Yanyan He<sup>d</sup>, Jiquan Liu<sup>e</sup>, Duane Charbonneau<sup>c</sup>, Rui Li<sup>e,2</sup>, Jian Xu<sup>a,2</sup>

5 <sup>a</sup>Single-Cell Center and Shandong Key Laboratory of Energy Genetics, Qingdao Institute of Bioenergy and Bioprocess Technology, Chinese Academy of Sciences, Qingdao, Shandong, 266101, China

<sup>b</sup> Department of Stomatology, Peking Union Medical College Hospital, Beijing, 100730, China

10 <sup>c</sup> Procter & Gamble Mason Business Center, Cincinnati, OH 45040, USA

<sup>d</sup> Procter & Gamble Innovation Center, Beijing 101312, China

<sup>e</sup> Procter & Gamble International Operations SA SG Branch, 138547, Singapore

<sup>f</sup> Sino-Danish Center for Education and Research, Beijing, 100190, China

<sup>g</sup> University of Chinese Academy of Sciences, Beijing, 100190, China

15

<sup>1</sup>These authors contributed equally to this work

<sup>2</sup>Correspondence: Tel: +86 532 8066 2651; fax: +86 532 8066 2654

E-mail address: [xujian@qibebt.ac.cn](mailto:xujian@qibebt.ac.cn) or [li.ru.5@pg.com](mailto:li.ru.5@pg.com)

20

Supplementary Information

Supplementary figures

Figure S1

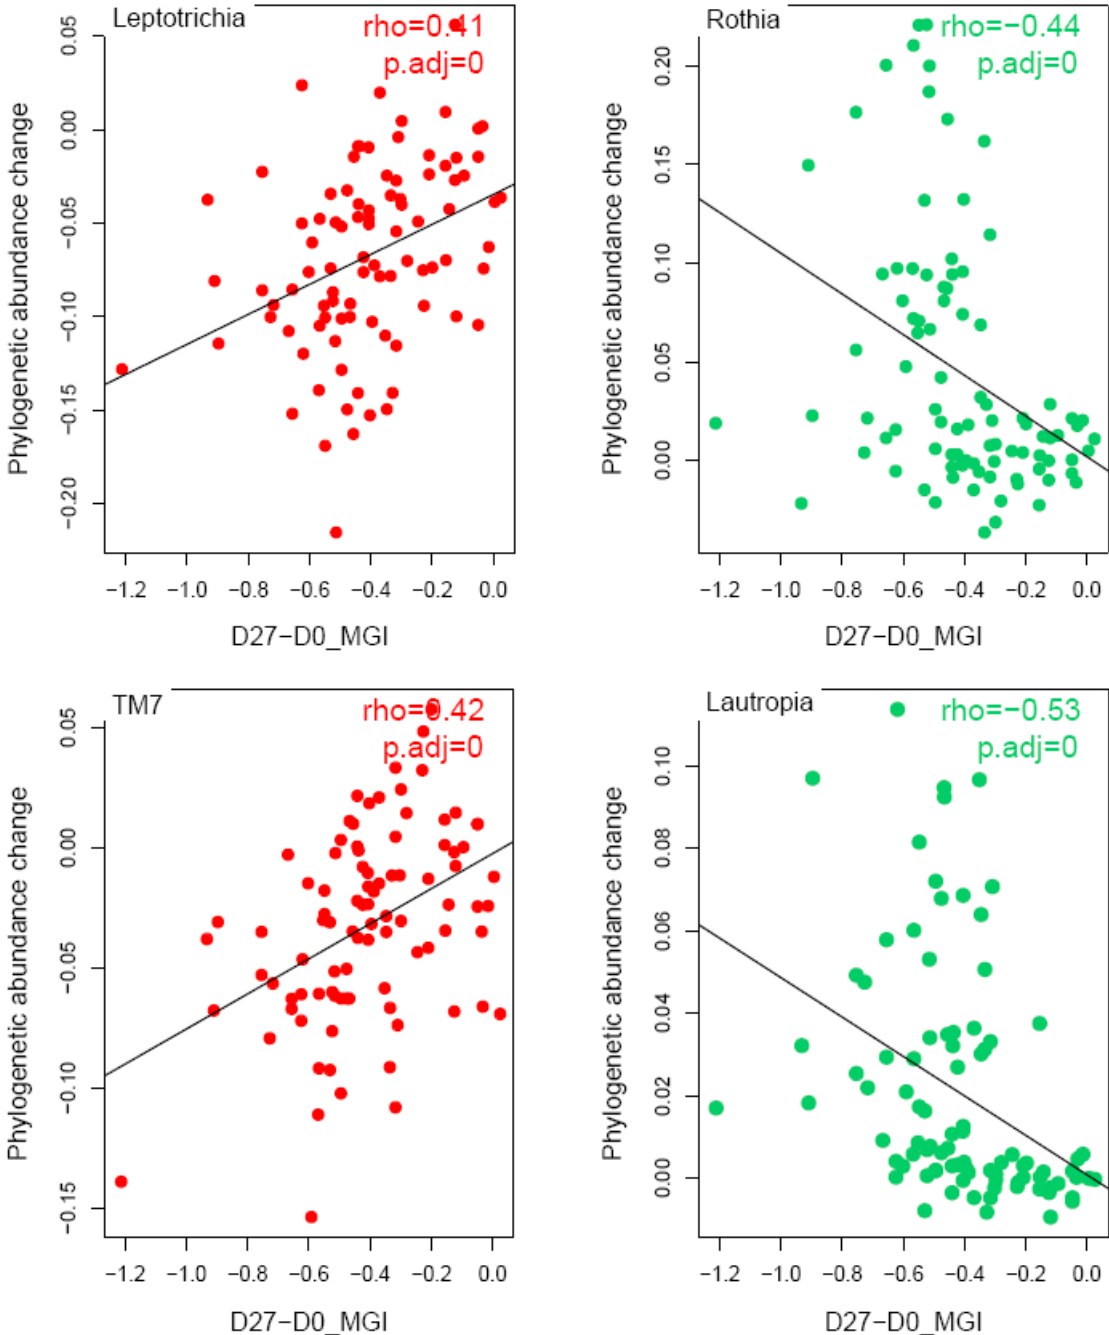

25 **Figure S1. Significant correlation between short-term changes in plaque bacteria from Baseline to Day 11, and mean MGI changes from Baseline to Day 27.**

Figure S2

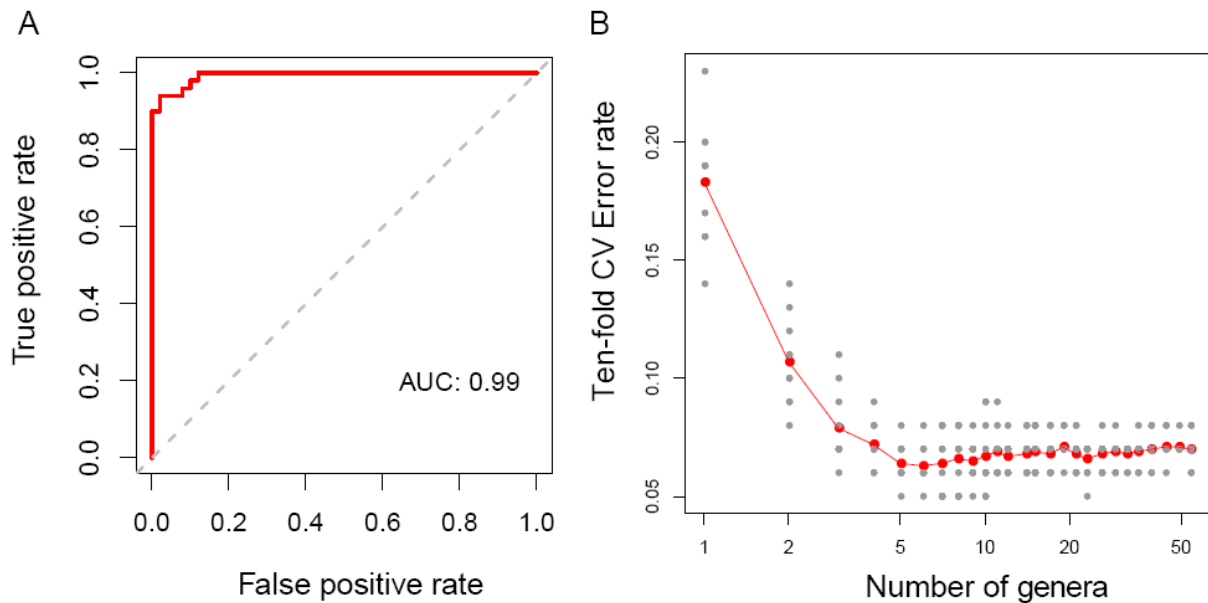

**Figure S2. Performance of the Random Forests model that was used to define “relative recovery of microbiota” during a given anti-gingivitis treatment.** Using the changes in plaque microbiota following dental scaling as a reference, the Random Forests model was trained using a data set of 50 subjects with gingivitis and post-dental-scaling healthy status from a previous study. **(A)** The discriminatory power of this model was calculated as the area under the ROC curve (AUC): 0.99. **(B)** Relationship between the number of variables and the model performance (ten-fold CV error rate).

Figure S3

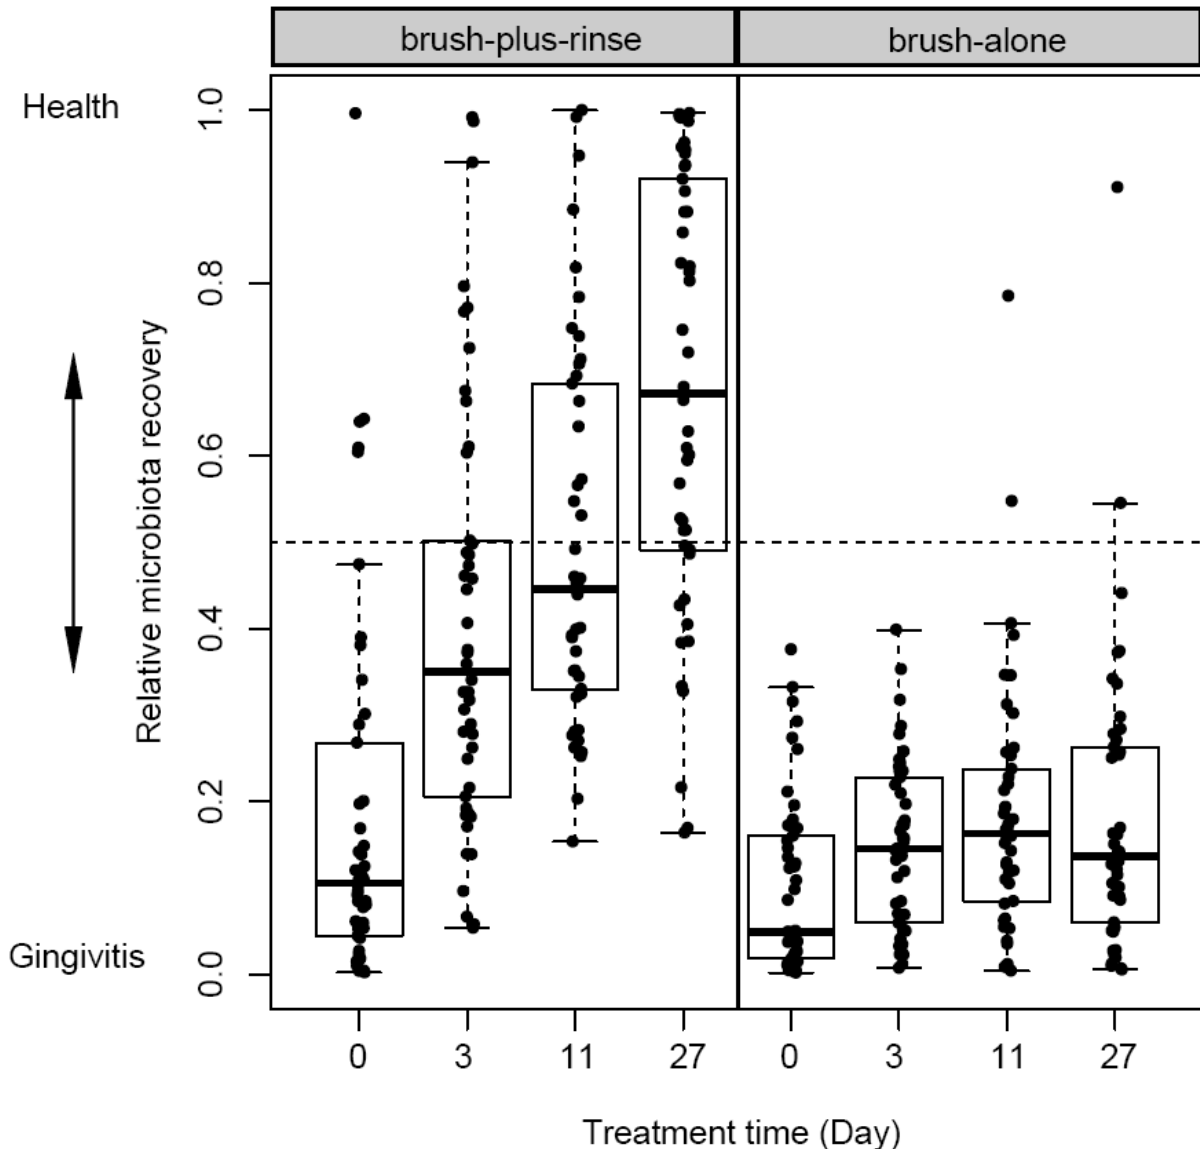

**Figure S3. Relative microbiota recovery defined by 15 genera identified in the MiG15 model.** Stratification of subjects in the brush-plus-rinse group and the brush-alone group, based on the top 15 genera previously noted as “MiG15”. MiG15, a microbial index of gingivitis, was calculated from the relative abundance of 15 bacterial genera (*Rothia*, *Haemophilus*, *Prevotella*, *Leptotrichia*, *Fusobacterium*, *Selenomonas*, *uncultured Lachnospiraceae*, *TM7*, *Tannerella*, *Peptococcus*, *Peptostreptococcus*, *Catonella*, *Treponema*, *Solobacterium* and *unclassified Bacteroidaceae*)<sup>1</sup>.

40

**Reference**

- 1 Huang, S. *et al.* Predictive modeling of gingivitis severity and susceptibility via oral microbiota. *ISME J* **8**, 1768-1780 (2014).
